# Supplementary material
Source: PubMed Central journal article supplement (PMC2775838)
Supplement: mmc1.pdf [file mmc1.pdf]

Supplemental Data

*AJHG*, Volume 85

Missense Mutations in a Retinal Pigment Epithelium

Protein, Bestrophin-1, Cause Retinitis Pigmentosa

Alice E Davidson, Ian D Millar, Jill E Urquhart, Rosemary Burgess-Mullan, Yusrah Shweikh, Neil Parry, James O'Sullivan, Geoffrey J Maher, Martin McKibbin, Susan M Downes, Andrew J Lotery, Samuel G Jacobson, Peter D Brown, Graeme CM Black, and Forbes DC Manson

Figure S1. Graphical Output of Parametric Linkage Analysis for Family 1 Carried Out Using Merlin Software

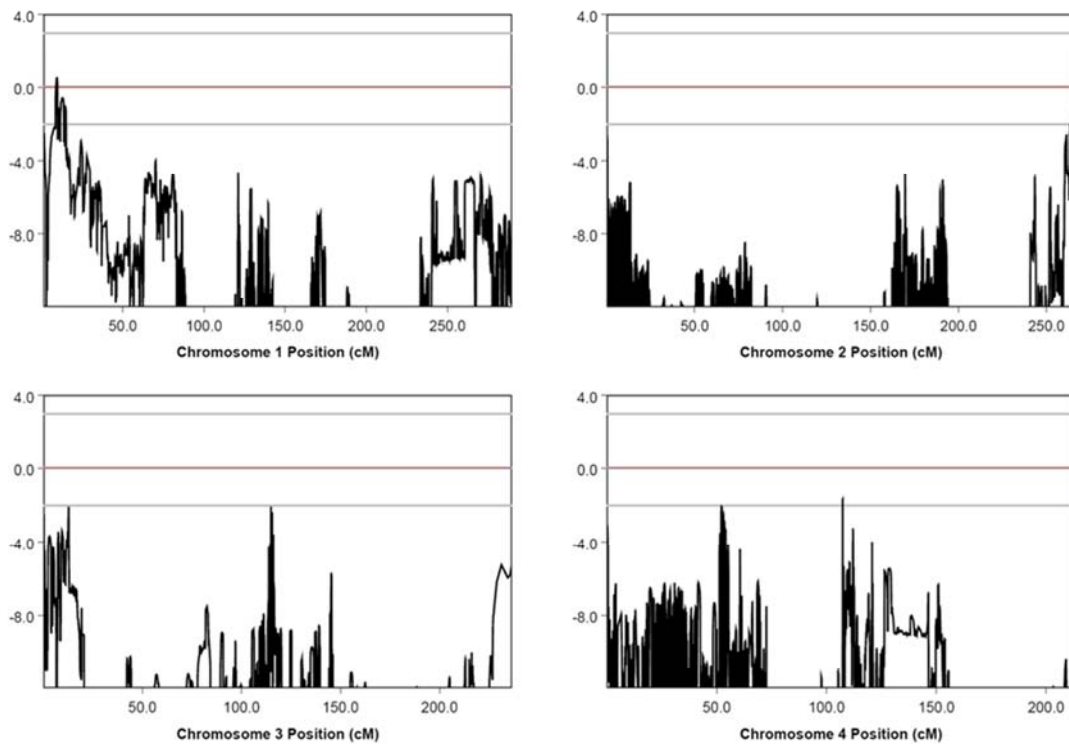

Analysis was carried out on 7 affected, and 2 unaffected, family members using a fully penetrant dominant model. Output for chromosomes 1-4.

**Figure S2. Graphical Output of Parametric Linkage Analysis for Family 1 Carried Out Using Merlin Software**

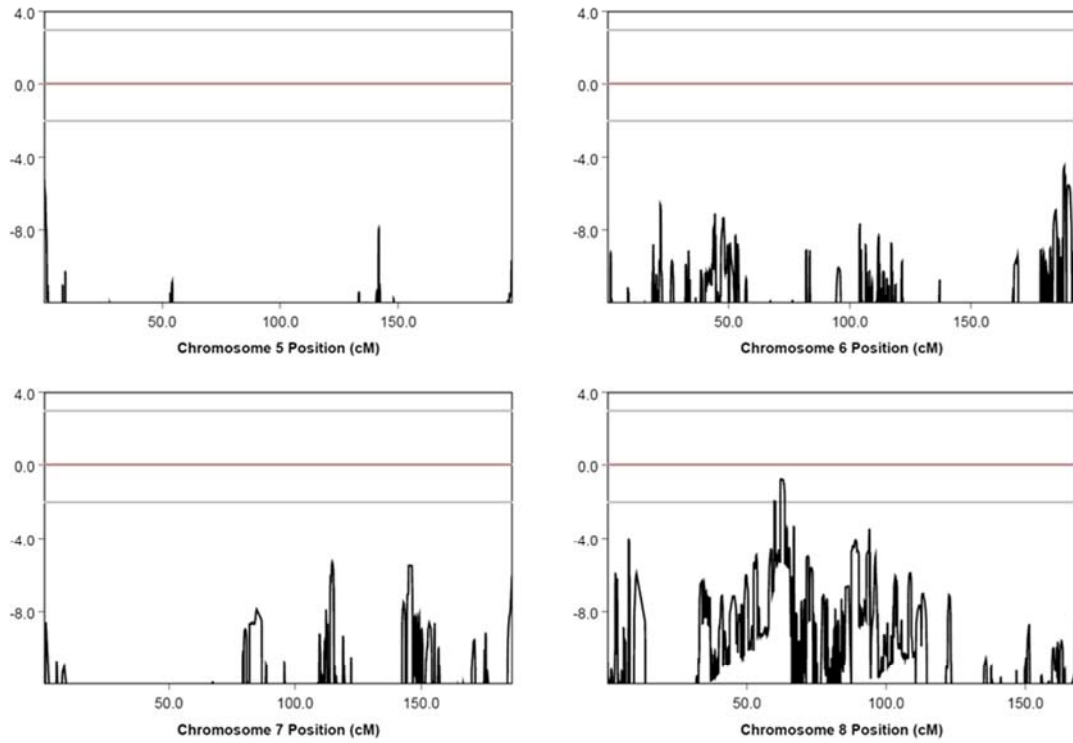

Analysis was carried out on 7 affected, and 2 unaffected, family members using a fully penetrant dominant model. Output for chromosomes 5-8.

**Figure S3. Graphical Output of Parametric Linkage Analysis for Family 1 Carried Out Using Merlin Software**

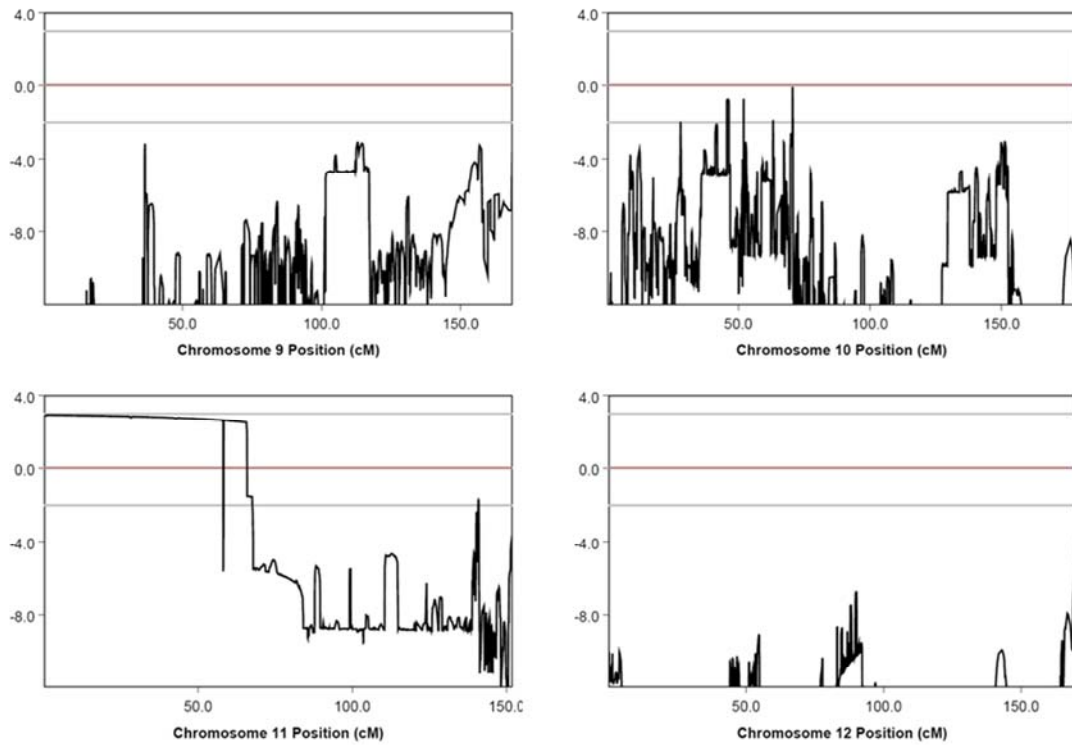

Analysis was carried out on 7 affected, and 2 unaffected, family members using a fully penetrant dominant model. Output for chromosomes 9-12.

**Figure S4. Graphical Output of Parametric Linkage Analysis for Family 1 Carried Out Using Merlin Software**

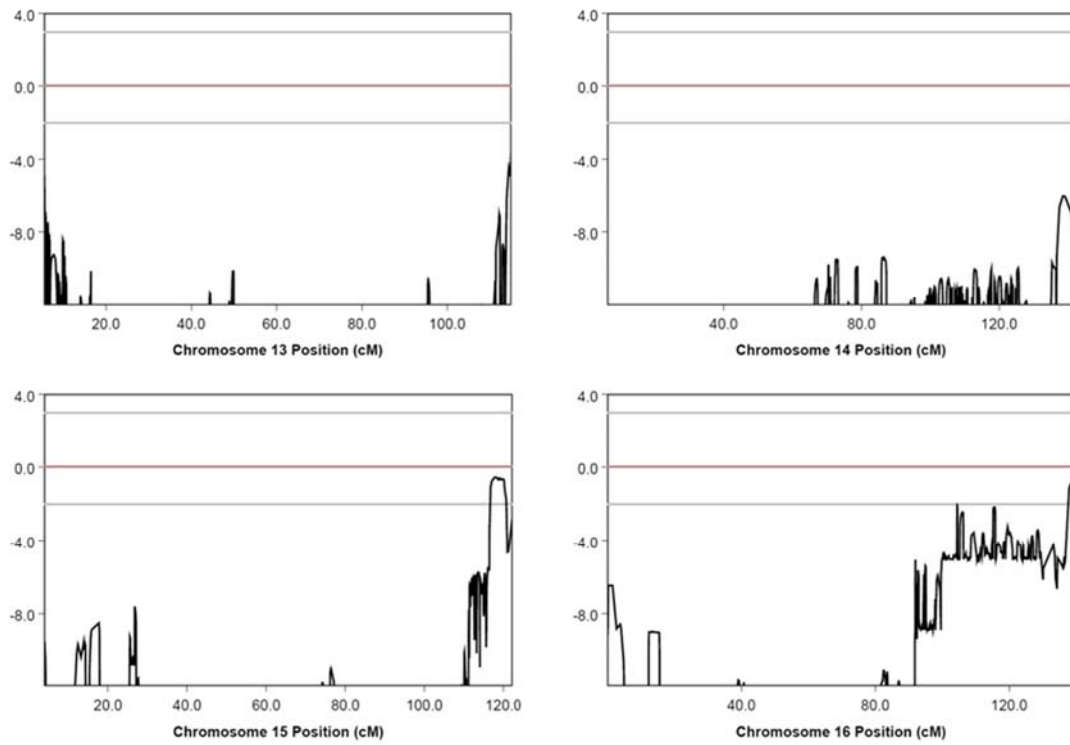

Analysis was carried out on 7 affected, and 2 unaffected, family members using a fully penetrant dominant model. Output for chromosomes 13-16.

**Figure S5. Graphical Output of Parametric Linkage Analysis for Family 1 Carried Out Using Merlin Software**

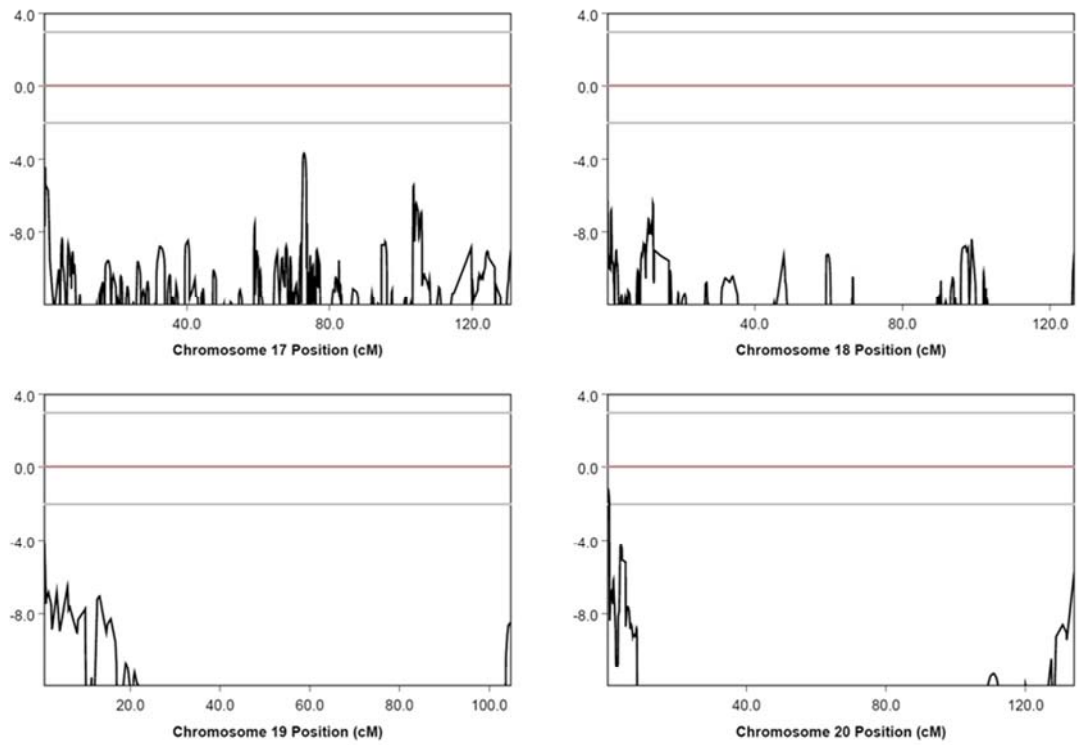

Analysis was carried out on 7 affected, and 2 unaffected, family members using a fully penetrant dominant model. Output for chromosomes 17-20.

**Figure S6. Graphical Output of Parametric Linkage Analysis for Family 1 Carried Out Using Merlin Software**

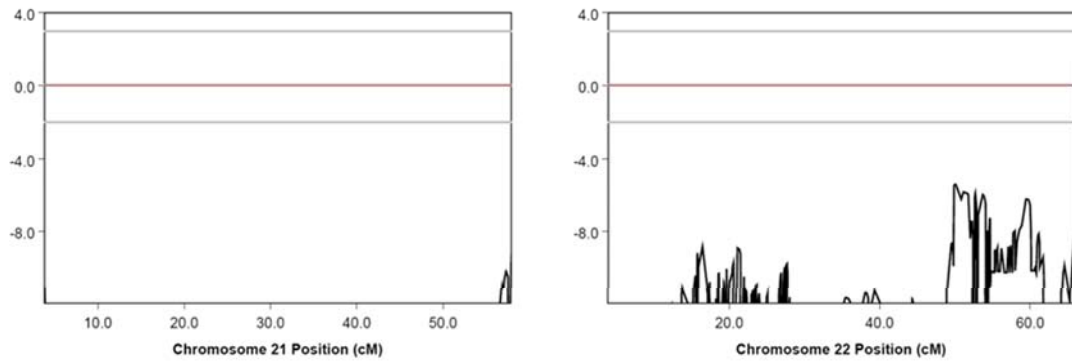

Analysis was carried out on 7 affected, and 2 unaffected, family members using a fully penetrant dominant model. Output for chromosomes 21 and 22.
